# Supplementary material for: Excessive Reactive Iron Impairs Hematopoiesis by Affecting Both Immature Hematopoietic Cells and Stromal Cells
Source: PubMed Central journal article supplement (PMC6468739; doi:10.3390/cells8030226), 2019-03-08
Supplement: cells-08-00226-s001.pdf [file cells-08-00226-s001.pdf]

# Figure S1

A

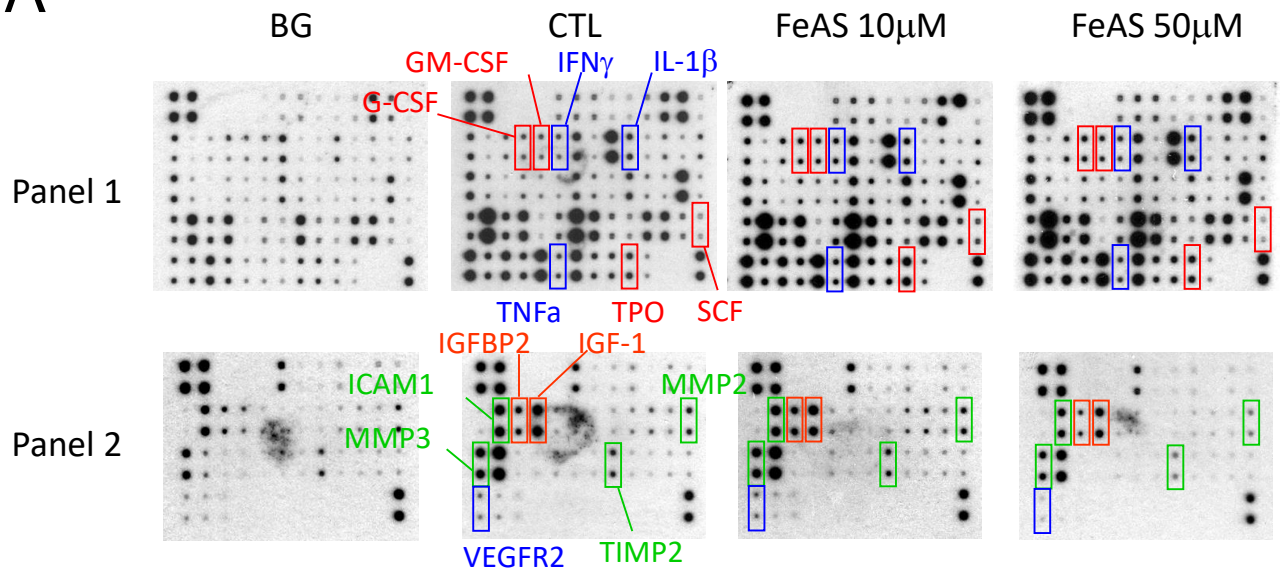

B

**RayBio® Mouse Cytokine Antibody Array C Series 1000**  
Combine Mouse Cytokine Antibody Array 3 and 4 to detect 96 cytokine expression in one experiment

**RayBio® Mouse Cytokine Antibody Array 3**  
Detect 62 cytokines and other proteins in one experiment

|    | A              | B          | C           | D     | E      | F              | G              | H        | I             | J              | K         | L          | M      | N          |
|----|----------------|------------|-------------|-------|--------|----------------|----------------|----------|---------------|----------------|-----------|------------|--------|------------|
| 1  | POS            | POS        | NEG         | NEG   | Blank  | Axl            | BLC            | CD30 L   | CD30 T        | CD40           | CRG-2     | CTACK      | CXCL16 | Eotaxin    |
| 2  | POS            | POS        | NEG         | NEG   | Blank  | Axl            | BLC            | CD30 L   | CD30 T        | CD40           | CRG-2     | CTACK      | CXCL16 | Eotaxin    |
| 3  | Eotaxin-2      | Fas Ligand | Fractalkine | GCSF  | GM-CSF | IFN $\gamma$   | IGFBP-3        | IGFBP-5  | IGFBP-6       | IL-1 $\alpha$  | IL-1 beta | IL-2       | IL-3   | IL-3 Rb    |
| 4  | Eotaxin-2      | Fas Ligand | Fractalkine | GCSF  | GM-CSF | IFN $\gamma$   | IGFBP-3        | IGFBP-5  | IGFBP-6       | IL-1 $\alpha$  | IL-1 beta | IL-2       | IL-3   | IL-3 Rb    |
| 5  | IL-4           | IL-5       | IL-6        | IL-9  | IL-10  | IL-12 p40/p70  | IL-12 p70      | IL-13    | IL-17         | KC             | Leptin R  | Leptin     | LIX    | L-Selectin |
| 6  | IL-4           | IL-5       | IL-6        | IL-9  | IL-10  | IL-12 p40/p70  | IL-12 p70      | IL-13    | IL-17         | KC             | Leptin R  | Leptin     | LIX    | L-Selectin |
| 7  | Lympholactin   | MCP1       | MCP-5       | M-CSF | MIG    | MIP-1 $\alpha$ | MIP-1 $\gamma$ | MIP-2    | MIP-3 $\beta$ | MIP-3 $\alpha$ | PF-4      | P-Selectin | RANTES | SCF        |
| 8  | Lympholactin   | MCP1       | MCP-5       | M-CSF | MIG    | MIP-1 $\alpha$ | MIP-1 $\gamma$ | MIP-2    | MIP-3 $\beta$ | MIP-3 $\alpha$ | PF-4      | P-Selectin | RANTES | SCF        |
| 9  | SDF-1 $\alpha$ | TARC       | TCA-3       | TECK  | TIMP-1 | TNF $\alpha$   | sTNF RI        | sTNF RII | TPO           | VCAM-1         | VEGF      | Blank      | Blank  | POS        |
| 10 | SDF-1 $\alpha$ | TARC       | TCA-3       | TECK  | TIMP-1 | TNF $\alpha$   | sTNF RI        | sTNF RII | TPO           | VCAM-1         | VEGF      | Blank      | Blank  | POS        |

**RayBio® Mouse Cytokine Antibody Array 4**  
Detect 34 cytokines and other proteins in one experiment

|   | A       | B           | C               | D         | E        | F     | G           | H      | I          | J                | K            | L       |
|---|---------|-------------|-----------------|-----------|----------|-------|-------------|--------|------------|------------------|--------------|---------|
| 1 | POS     | POS         | NEG             | NEG       | BLANK    | bFGF  | DPPIV/CD26  | Dtk    | E-Selectin | Fc $\gamma$ RIIB | Flt-3 Ligand | GITR    |
| 2 | POS     | POS         | NEG             | NEG       | BLANK    | bFGF  | DPPIV/CD26  | Dtk    | E-Selectin | Fc $\gamma$ RIIB | Flt-3 Ligand | GITR    |
| 3 | HGF R   | ICAM-1      | IGFBP-2         | IGF-I     | IGF-II   | IL-15 | IL-17B R    | IL-7   | I-TAC      | Lungkine         | MDC          | MMP-2   |
| 4 | HGF R   | ICAM-1      | IGFBP-2         | IGF-I     | IGF-II   | IL-15 | IL-17B R    | IL-7   | I-TAC      | Lungkine         | MDC          | MMP-2   |
| 5 | MMP-3   | Osteopontin | Osteoprotegerin | Pro-MMP-9 | Resistin | Shh-N | Thymus CK-1 | TIMP-2 | TRANCE     | TROY             | TSLP         | VEGF R1 |
| 6 | MMP-3   | Osteopontin | Osteoprotegerin | Pro-MMP-9 | Resistin | Shh-N | Thymus CK-1 | TIMP-2 | TRANCE     | TROY             | TSLP         | VEGF R1 |
| 7 | VEGF R2 | VEGF R3     | VEGF-D          | BLANK     | BLANK    | BLANK | BLANK       | BLANK  | BLANK      | BLANK            | BLANK        | POS     |
| 8 | VEGF R2 | VEGF R3     | VEGF-D          | BLANK     | BLANK    | BLANK | BLANK       | BLANK  | BLANK      | BLANK            | BLANK        | POS     |

\* For use with serum, plasma, condition medium, urine and all other body fluids, cell lysates and certain tissue lysates samples
